# Supplementary material
Source: HighWire-hosted journal article supplement (https://www.annfammed.org/highwire/filestream/7797/field_highwire_adjunct_files/0/Pace_HIPAA_App1.pdf)
Supplement: Pace_HIPAA_App1.pdf [file Pace_HIPAA_App1.pdf]

**Online Supplementary Material**

Pace WD, Staton EW, Holcomb S. Practice-based research network studies in the age of HIPAA. *Ann Fam Med.* 2005;3(Suppl 1):S38-S45.

[http://www.annfammed.org/cgi/content/full/3/suppl\\_1/S38](http://www.annfammed.org/cgi/content/full/3/suppl_1/S38)

**Supplemental Appendix 1. Example of an Authorization for Research**

|                                                                                                                                                                                                                                                                                                                                                                                                                                                                                                                                                                                                                                                                                                                                                                                                                                                                                                                                                                                                                                                                                                                                                                                                                                                                                                                                                                                                                                                                                                                                                                                                                                                                                                                                                                                                                                                                                                                                                                                                                                                                                                                                                                                                                                                                                                                                                                                                                                                                                                                                                                                                                                                |                            |
|------------------------------------------------------------------------------------------------------------------------------------------------------------------------------------------------------------------------------------------------------------------------------------------------------------------------------------------------------------------------------------------------------------------------------------------------------------------------------------------------------------------------------------------------------------------------------------------------------------------------------------------------------------------------------------------------------------------------------------------------------------------------------------------------------------------------------------------------------------------------------------------------------------------------------------------------------------------------------------------------------------------------------------------------------------------------------------------------------------------------------------------------------------------------------------------------------------------------------------------------------------------------------------------------------------------------------------------------------------------------------------------------------------------------------------------------------------------------------------------------------------------------------------------------------------------------------------------------------------------------------------------------------------------------------------------------------------------------------------------------------------------------------------------------------------------------------------------------------------------------------------------------------------------------------------------------------------------------------------------------------------------------------------------------------------------------------------------------------------------------------------------------------------------------------------------------------------------------------------------------------------------------------------------------------------------------------------------------------------------------------------------------------------------------------------------------------------------------------------------------------------------------------------------------------------------------------------------------------------------------------------------------|----------------------------|
| <p><b>Authorization to Use or Release<br/>                 Health Information About Me<br/>                 for Research Purposes</b></p> <p><b><i>Authorization B: Enrollment Into Research</i></b></p>                                                                                                                                                                                                                                                                                                                                                                                                                                                                                                                                                                                                                                                                                                                                                                                                                                                                                                                                                                                                                                                                                                                                                                                                                                                                                                                                                                                                                                                                                                                                                                                                                                                                                                                                                                                                                                                                                                                                                                                                                                                                                                                                                                                                                                                                                                                                                                                                                                       | <p><b>Study Title:</b></p> |
| <p><b>I</b> _____ <i>(Patient's Full Name)</i> <b>authorize</b><br/>                 _____ <i>(PI's or Physician's Name)</i> <b>and staff members of</b><br/>                 _____ <i>(Facility Name)</i> <b>working for him/her to use the following</b><br/> <b>health information about me for research:</b> <i>(Please check the appropriate boxes. NOTE: If a category is checked Yes and a line follows the category, you MUST describe the type of the procedures done.)</i></p> <p><b>No Yes</b></p> <p><input type="checkbox"/> <input type="checkbox"/> Name and/or phone number</p> <p><input type="checkbox"/> <input type="checkbox"/> Demographic information (age, sex, ethnicity, address, etc)</p> <p><input type="checkbox"/> <input type="checkbox"/> Diagnosis(es)</p> <p><input type="checkbox"/> <input type="checkbox"/> History and/or physical</p> <p><input type="checkbox"/> <input type="checkbox"/> Laboratory or tissue studies: _____</p> <p><input type="checkbox"/> <input type="checkbox"/> Radiology studies: _____</p> <p><input type="checkbox"/> <input type="checkbox"/> Testing for or infection with human immunodeficiency virus (HIV) (or results)</p> <p><input type="checkbox"/> <input type="checkbox"/> Procedure results: _____</p> <p><input type="checkbox"/> <input type="checkbox"/> Psychological tests: _____</p> <p><input type="checkbox"/> <input type="checkbox"/> Survey/questionnaire: _____</p> <p><input type="checkbox"/> <input type="checkbox"/> Research visit records</p> <p><input type="checkbox"/> <input type="checkbox"/> Portions of previous medical records that are relevant to this study</p> <p><input type="checkbox"/> <input type="checkbox"/> Billing or financial information</p> <p><input type="checkbox"/> <input type="checkbox"/> Drug abuse</p> <p><input type="checkbox"/> <input type="checkbox"/> Alcoholism or alcohol abuse</p> <p><input type="checkbox"/> <input type="checkbox"/> Sickle cell anemia</p> <p><input type="checkbox"/> <input type="checkbox"/> Other (specify): _____</p> <p><b>For the Specific Purpose of</b></p> <p><input type="checkbox"/> Collecting data for this research project</p> <p><input type="checkbox"/> Other*: _____</p> <p><i>*Cannot say "for any and all research," "for any purpose," etc</i></p> <p><b>If my health information that identifies me is also going to be given out to others outside the facility, the recipients are described on the next page(s).</b></p> <p><input type="checkbox"/> <b>No personally identifiable health information about me will be disclosed to others.</b></p> |                            |

**The PI (or staff acting on behalf of the PI) will also make the following health information about me available to:**  
(check all that apply and **describe the type of the procedures done** where applicable)

Recipient (*name of person or group*) \_\_\_\_\_

**No Yes**

**All** research data collected in this study (if you check this box Yes, no other boxes need to be checked in this section)

Name and phone number

Demographic information (age, sex, ethnicity, address, etc)

Diagnosis(es)

History and physical

Laboratory or tissue studies: \_\_\_\_\_

Radiology studies: \_\_\_\_\_

Testing for or infection with human immunodeficiency virus (HIV) (or results)

Procedure results: \_\_\_\_\_

Psychological tests: \_\_\_\_\_

Survey/questionnaire: \_\_\_\_\_

Research visit records

Portions of previous medical records that are relevant to this study

Billing or financial information

Drug abuse

Alcoholism or alcohol abuse

Sickle cell anemia

Other (specify): \_\_\_\_\_

**For the Specific Purpose of**

Evaluation of this research project

Evaluation of laboratory/tissue samples

Data management

Data analysis

Other\*: \_\_\_\_\_

*\*Cannot say "for any and all research," "for any purpose," etc*

*For additional Recipients, copy this page as needed.*

Online Supplementary Data

http://www.annfammed.org/cgi/content/full/3/suppl\_1/S38

I give my authorization knowing that:

- I do not have to sign this authorization. But if I do not sign it, the researcher has the right to not let me be in the research study.
- I can cancel this authorization any time.
  - I have to cancel it in writing.
  - If I cancel it, the researchers and the people the information was given to will still be able to use it because I had given them my permission, but they won't get any more information about me.
  - If I cancel my authorization, I may no longer be able to be in the study.
  - I can read the Notice of Privacy Practices at the facility where the research is being conducted to find out how to cancel my authorization.
- The records given out to other people may be given out by them and might no longer be protected.
- I will be given a copy of this form after I have signed and dated it.

This authorization will expire on: \_\_\_\_\_ (Date) OR

- The end of the research study
- Will not expire
- \_\_\_\_\_

(Describe dates or circumstances under which the authorization will expire.)

ADDITIONAL INFORMATION: \_\_\_\_\_

\_\_\_\_\_  
Patient's Signature Date

\_\_\_\_\_  
Signature of Legal Representative (if applicable) Date

\_\_\_\_\_  
Name of Legal Representative (please print)

\_\_\_\_\_  
Description of Legal Authority to Act on Behalf of Patient
